# Supplementary material for: iTRAQ Based Protein Profile Analysis Revealed Key Proteins Involved in Regulation of Drought-Tolerance During Seed Germination in Adzuki Bean
Source: Research Square preprint supplement (doi:10.21203/rs.3.rs-762775/v1), 2021-08-05
Supplement: Supplementary file 1 [file da4c1dce1b0c4b8ff3ae397a.xlsx]

## Sheet: Sheet1
Supplementary TableS7. primers for qPCR or gene amplification
Primer	Accession	Template strand (5' to 3')
LR48_Vigan627s008100-q-F	A0A0L9TF45	ACAGGGCGTTTCTGTGGAAT
LR48_Vigan627s008100-q-R	A0A0L9TF45	AGGAAAACCCCGAAATGGCA
LR48_Vigan01g003600-q-F	A0A0L9TJ92	CACCCCTCTGTGTCGAGAGT
LR48_Vigan01g003600-q-R	A0A0L9TJ92	GCTCAAATGACTGACAGGCG
LR48_Vigan01g212000-q-F	A0A0L9TQX2	TTTTAAGGCACCGGGTCCAG
LR48_Vigan01g212000-Q-R	A0A0L9TQX2	ATCAGGAGTGCAACTTGGTCA
LR48_Vigan03g172100-q-F	A0A0L9U7B9	CACCTGAGTAGCACCCATCC
LR48_Vigan03g172100-q-R	A0A0L9U7B9	GCTAATCAAGCGGGGTGAGA
LR48_Vigan07g057600-q-F	A0A0L9UWB5	ACCTGCCAGTCATCAAATGGT
LR48_Vigan07g057600-q-R	A0A0L9UWB5	TCCACTGGTACAGCATCCAT
LR48_Vigan07g243200-q-F	A0A0L9V113	AGAGCAGAATCCATGCCACA
LR48_Vigan07g243200-q-R	A0A0L9V113	ACCTTACACTCATGCTCCTACA
LR48_Vigan08g189000-q-F	A0A0L9V7V3	GTCCTTCCTCAGGCCCTACT
LR48_Vigan08g189000-q-R	A0A0L9V7V3	CGCACTCTATGGCGGAAACT
LR48_Vigan09g069200-q-F	A0A0L9VAK7	TGAGAAGCTGGGGAGTAGCA
LR48_Vigan09g069200-q-R	A0A0L9VAK7	CACTTGGCTTGTGTTTCAGGAG
LR48_Vigan09g157400-q-F	A0A0L9VCX3	TCAGAGACAAGACTGCCACG
LR48_Vigan09g157400-q-R	A0A0L9VCX3	CGTCGTTTTGAAAGGTGCCA
LR48_Vigan10g197700-q-F	A0A0L9VM15	GCAATCGAGCAGCACTAAGC
LR48_Vigan10g197700-q-R	A0A0L9VM15	TGAGGCTGGAGGTAGGTTGT
LR48_Vigan11g088300-q-F	A0A0L9VS04	GCCACCATCACTACAGTAGCA
LR48_Vigan11g088300-q-R	A0A0L9VS04	AGACAGGCAGGGATCAAACA
VaVHA-c-F	A0A0L9TJ92	CGACGACAAGACCCTATGGCGAGTAGGTACTGGGCAG
VaVHA-c-R	A0A0L9TJ92	GAGGAGAAGAGCCCTCAAGCAAGATTGATAGTGA
VaVHA-c-RT-F	A0A0L9TJ92	GTCCACAACTCCGCATCTCAAC
VaVHA-c-RT-R	A0A0L9TJ92	GCTTCATCCCAAACAAACCTAG
actin-RT-F	X69885	CCCTCCCACATgCTATTCT
actin-RT-R	X69885	AGAGCCTCCAATCCAGACA
